# 1 Direct and indirect phenotypic effects on sociability indicate potential to evolve

2

3 David N. Fisher

4 School of Biological Sciences, University of Aberdeen, King's College, Aberdeen, AB243FX, UK

5 david.fisher@abdn.ac.uk

6

## 7 Abstract

8 The decision to leave or join a group is important as group size influences many aspects of  
9 organisms' lives and their fitness. This tendency to socialise with others, sociability, should be  
10 influenced by genes carried by focal individuals (direct genetic effects) and by genes in partner  
11 individuals (indirect genetic effects), indicating the trait's evolution could be slower or faster than  
12 expected. However, estimating these genetic parameters is difficult. Here, in a laboratory population  
13 of the cockroach *Blaptica dubia*, I estimate phenotypic parameters for sociability: repeatability ( $R$ )  
14 and repeatable influence ( $RI$ ), that indicate whether direct and indirect genetic effects respectively  
15 are likely. I also estimate the interaction coefficient ( $\Psi$ ), which quantifies how strongly a partner's  
16 trait influences the phenotype of the focal individual and is key in models for the evolution of  
17 interacting phenotypes. Focal individuals were somewhat repeatable for sociability across a three-  
18 week period ( $R = 0.095$ ), and partners also had marginally consistent effects on focal sociability ( $RI =$   
19  $0.045$ ). The interaction coefficient was non-zero, although in opposite sign for the sexes; males  
20 preferred to associate with larger individuals ( $\Psi_{\text{male}} = -0.130$ ) while females preferred to associate  
21 with smaller individuals ( $\Psi_{\text{female}} = 0.032$ ). Individual sociability was consistent between dyadic trials  
22 and in social networks of groups. These results provide phenotypic evidence that direct and indirect  
23 genetic effects influence sociability, with perhaps most evolutionary potential stemming from  
24 heritable effects of the body mass of partners. Sex-specific interaction coefficients may produce  
25 sexual conflict and the evolution of sexual dimorphism in social behaviour.

26 **Key words:** cockroach, group size, heritability, indirect genetic effects, interaction coefficient,  
27 personality, repeatability, sociability, social network

28

## 29 Introduction

30

31 Many animals form groups and aggregations to find food, avoid predators, and to be buffered from  
32 environmental stressors (Krause & Ruxton, 2002). Individual sociability is therefore an important  
33 trait that can influence access to resources, mating opportunities, predators, and disease (Gartland  
34 *et al.*, 2022). This importance means it is often linked to fitness. Further, in aggregate individual  
35 sociability determines group size, which in its own right can have influences on individuals' fitness  
36 components (Silk, 2007). These links with fitness imply sociability is frequently under selection, and  
37 therefore would be expected to evolve. Predicting how individual sociability, and therefore also  
38 group size, will evolve requires us to estimate the genetic variance underpinning the trait i.e. its  
39 heritability (Scott *et al.*, 2018). Typically, when estimating the heritability of a trait we consider the  
40 direct additive genetic variance underpinning it i.e., how much variance among individuals in their  
41 own genes relates to variance in their phenotypes (hereafter direct genetic effects, "DGEs").  
42 However, alongside its own social tendencies an individual's sociability will likely depend on the

43 traits of others in the groups it may join. For example, a normally sociable individual may be less  
44 willing to join a group with particularly aggressive individuals. As the traits of others will be at least  
45 partly influenced by genes, the heritable variation in sociability is likely to stem not only from DGEs,  
46 but also indirect genetic effects (IGEs), where genes in an interacting individual influence the focal  
47 individual's trait (Griffing, 1967; Moore *et al.*, 1997a). The presence of IGEs (and their covariance  
48 with DGEs) can accelerate evolutionary change, retard it, remove it completely, or even reverse it  
49 (Moore *et al.*, 1997a; Wolf *et al.*, 1998), potentially leading to non-linear responses to selection  
50 (Trubenová *et al.*, 2015), responses to selection in the opposite direction to that of direct selection  
51 (Bijma & Wade, 2008; Fisher & Pruitt, 2019) and even maladaptation (Fisher & McAdam, 2019;  
52 McGlothlin & Fisher, 2021). Indirect genetic effects are widely appreciated in animal and plant  
53 breeding for their ability to prevent the evolution of higher yields (Muir, 2005; Ellen *et al.*, 2014;  
54 Costa e Silva *et al.*, 2017), and are becoming increasingly well appreciated in evolutionary ecology  
55 (Baud *et al.*, 2022). If we want to understand how evolution shapes variation in sociability, the  
56 diversity of group sizes in nature, and how these traits might evolve in the future, we need to  
57 estimate how important both DGEs and IGEs are for individual sociability.

58 Despite the clear need to measure DGEs and IGEs on sociability, estimates of DGEs are quite rare  
59 (Lea *et al.*, 2010; Brent *et al.*, 2013; Staes *et al.*, 2016; Knoll *et al.*, 2018; Scott *et al.*, 2018), and  
60 estimates of IGEs are completely absent (although Lea *et al.* did estimate DGEs for the tendency to  
61 receive interactions in a social network of marmots, which should be very similar to IGEs for initiating  
62 interactions). This can be partially attributed to two factors: 1) Experimental design to quantify  
63 individual sociability and how it is influenced by both direct and indirect effects can be difficult  
64 (Gartland *et al.*, 2022) and 2) Estimating DGEs and IGEs in any context requires large amounts of  
65 both phenotypic data and information on genetic relatedness (Moore *et al.*, 1997a; Bijma, 2014;  
66 Kruuk & Wilson, 2018). While 1) can be solved with appropriate experimental design, solving 2) can  
67 be logistically challenging. One partial (and temporary) solution is to estimate parameters that  
68 represent DGEs and IGEs at the phenotypic level, which does not require data on genetic relatedness  
69 and may also require less data overall as phenotypic variances are typically larger than genetic  
70 variances. Although not ideal, these parameters can still give insight into the evolutionary potential  
71 of the trait of interest as the relative magnitude of phenotypic and genetic variances (and  
72 covariances) are normally aligned (Hadfield *et al.*, 2007; Dochtermann, 2011; Dochtermann *et al.*,  
73 2015).

74 For DGEs, the phenotypic parameter that (in most cases) sets the upper limit for heritability is  
75 repeatability ( $R$ , but see: Dohm, 2002). Repeatability is defined as the portion of phenotypic variance  
76 attributable to among individual differences ( $V_I$ ; Nakagawa & Schielzeth, 2010). This parameter can  
77 be decomposed into additive genetic variance and permanent environmental variance ( $V_I = V_A +$   
78  $V_{PE}$ ); where for behavioural traits on average 52% of  $V_I$  stems from  $V_A$  (Dochtermann *et al.*, 2015).  
79 We can therefore think of  $R$  as a phenotypic proxy for DGEs (as well as providing useful information  
80 about the relative balance between among- and within-individual variation in the population).  
81 Regarding IGEs, an analogous phenotypic equivalent in dyadic interactions would be the variance  
82 attributed to the identity of the interaction partner ( $V_S$ ). We could then calculate "repeatable  
83 influence" ( $RI$ ) as the portion of phenotypic variance in the focal individual's trait attributable to the  
84 among partner differences. For interactions with multiple partners,  $V_S$  is multiplied by the average  
85 number of interaction partners (Bijma, 2011), and so can lead to the variance attributable to social  
86 interactions being greater than the phenotypic variance (Bijma *et al.*, 2007; see: Ellen *et al.*, 2014 for  
87 empirical examples of the total heritable variation of a trait being greater than the phenotypic  
88 variance, due to IGEs), which makes it less directly relatable to  $R$ . Estimating both  $R$  and  $RI$  should

89 give us a good indication of the *relative* contribution of DGEs and IGEs to a trait, while also giving  
90 some indication of the likely *absolute* magnitude of these parameters.

91 Alternatively to estimating DGEs and IGEs, a parameter widely used to infer their importance of  
92 social interactions in evolution is the interaction coefficient ( $\Psi$ ; Moore *et al.*, 1997a; Bailey &  
93 Desjonquères, 2022). This term is the coefficient from a regression of the focal individual's  
94 phenotype on an interacting individual's trait. It therefore does not require data on genetic  
95 relatedness. The  $\Psi$  term is key in the "trait-based" approach for understanding the role of social  
96 interactions in evolution, as opposed to the "variance-based" approach, which relies on DGEs, IGEs,  
97 and their covariance (McGlothlin & Brodie, 2009).  $\Psi$  can alter the direction and steepness of  
98 evolutionary trajectories, lead to feedback between interacting traits, and result in non-linear  
99 change (Bailey & Desjonquères, 2022). Additionally,  $\Psi$  can be converted into a direct-indirect  
100 covariance if the genetic variances of the traits of interest are known (McGlothlin & Brodie, 2009).  
101 We can therefore think of  $\Psi$  as both an important evolutionary parameter in its own right and as a  
102 phenotypic indicator of the likely magnitude of key genetic covariances. Together,  $R$ ,  $RI$ , and  $\Psi$  give  
103 us useful indicators of the likely importance of DGEs and IGEs for a trait's evolution, and so  
104 estimating them for sociability will give us a reasonable indicator for how this trait, and therefore  
105 group size, may evolve in the absence of genetic information.

106 Here, I estimated  $R$ ,  $RI$ , and  $\Psi$  for sociability in the gregarious cockroach *Blaptica dubia*. This is a  
107 communally living species who form aggregations in refuges to access resources, avoid predators  
108 such as ants, and to buffer environmental perturbations (Grandcolas, 1998) – hence their sociability  
109 is an important trait for their survival and fitness. I measured sociability in dyadic trials repeatedly  
110 to allow me to estimate consistency in sociability ( $R$ ) and to isolate the consistent effect of a partner  
111 individual on the focal ( $RI$ ). I also tested how a trait of the interaction partner influences the focal  
112 individual's sociability to quantify  $\Psi$ . I used body mass as the trait in interacting individuals as it is  
113 typically heritable; Clark and Moore (1995) estimated the full-sibling heritability (likely to be an  
114 overestimate) of body mass in the Madagascar hissing cockroach (*Gramphadorhina portentosa*),  
115 which like *B. dubia* is in the Blaberidae family, as 0.93, while Moore *et al.* (2004) estimated the  
116 heritability of pronotum width in the speckled cockroach (*Nauphoeta cinerea*, also a Blaberid) as  
117 0.62. Therefore, a clear estimate of  $\Psi$  for body mass would indicate social interactions are likely to  
118 be important for the evolution of sociability. To confirm the wider relevance of the dyadic trials used  
119 to estimate  $R$ ,  $RI$ , and  $\Psi$ , I also tested whether estimates of sociability in a dyadic trial correlate with  
120 measures of sociability from a group context using social networks of up to 24 individuals. I  
121 predicted that sociability will be repeatable, be repeatable influenced by the identity of the partner  
122 individual, and that individuals will prefer to interact with larger partners (as smaller values in my  
123 sociability assay indicate more sociable, this means  $\Psi < 0$ ) as they represent better protection from  
124 predators and the elements. I also predicted that there would be a correlation between the  
125 measures of sociability in the dyadic and group context.

126

## 127 Methods

128

### 129 Experimental animals

130 *Blaptica dubia* is a quite large (up to 45 mm in length) sexually dimorphic blaberid cockroach (Wu,  
131 2013). They typically live in aggregations at high temperature and humidity in central and south  
132 America (Alamer & Hoffmann, 2014), consuming vegetative matter, and are ovoviviparous. They are  
133 described as "gregarious" (Grandcolas, 1998) or "communal" as individuals of the same generation

134 cohabit (without shared parental care; Bewick *et al.*, 2017). I purchased an initial colony of *B. dubia*  
135 online in March 2021. I maintained them at the University of Aberdeen at 28°C, 50% humidity, with a  
136 50:50 light:dark light cycle. I provided them with cardboard egg trays for shelter, carrot for  
137 hydration, and Sainsbury's Complete Nutrition Adult Small Dog Dry Dog Food (approx. nutritional  
138 composition = 1527 kJ energy, 24g protein, 12g fat per 100g) for nutrition. Mortality was very low at  
139 all life stages. I moved newly born nymphs every few days to a container of dimensions 610 x 402 x  
140 315 mm of similar aged individuals (density ranged from a few hundred of the earliest instars to 10-  
141 80 of later instars) and maintained them in mixed groups until adulthood (seven instars which takes  
142 approx. 250 days at this temperature; Wu, 2013). Upon reaching adulthood I moved them to either  
143 single sex groups (again in containers of 610 x 402 x 315 mm) or in small groups of two males and  
144 four to eight females in a container of dimensions 340 x 200 x 125 mm for breeding to maintain the  
145 stock population. For this experiment I selected 48 unmated males and 48 unmated females from  
146 the single-sex adult groups. I transferred each individual to a clear plastic box (79 x 47 x 22 mm)  
147 labelled with its unique ID to allow individual recognition. I gave individuals a small piece of carrot  
148 for hydration which was replaced weekly.

149

#### 150 Data collection

151 I tested individuals in two blocks of 48, treating all individuals in each block once as a focal individual  
152 and once as a partner for a member of the same sex over two days. This means that in the first two  
153 days 24 males and 24 females were each assayed for sociability once and each acted as a partner  
154 individual once. On days three and four I repeated this with a second block of 24 males and 24  
155 females. In this way individuals only ever acted as focal or partner individuals with members of the  
156 same sex in the same block (either first or second) and were each assayed for sociability and acted  
157 as a partner once per week. I repeated this for three weeks, so each individual was assayed up to  
158 three times as a focal individual as acted as a partner up to three times. Some individuals received  
159 fewer than three trials if they died ( $n = 5$  males and 0 females), in which case I replaced them with a  
160 member of the same sex from the stock population (who did *not* inherit the same ID and was  
161 therefore another unique individual). Individuals might also record fewer than three measures for  
162 sociability if the mesh was breached by either the partner or the focal before the trial began (11  
163 females and eight males recorded one measure, 48 females and 42 males recorded two measures,  
164 30 females and 54 males recorded three measures).

165 I assayed sociability in medium sized plastic boxes (200 x 100 x 70 mm) where I glued a fine  
166 polypropylene mesh (mesh size 0.6 x 0.6 mm, Micromesh, Haxnicks) across the interior 50 mm from  
167 one end. This creates an arena with a small compartment (50 x 100 x 70 mm) and a large  
168 compartment (150 x 100 x 70 mm) separated by the mesh (Fig. 1A). Separating by mesh was  
169 necessary to prevent a partner individual imposing close proximity on the focal individual by  
170 constantly following or attempting to dominate it (Clark *et al.*, 1995), and therefore my assay  
171 captures the focal individual's willingness to socialise, rather than the partner's (Gartland *et al.*,  
172 2022). For the first block I randomly placed 12 females and 12 males each into the large  
173 compartment of one of the plastic boxes. These were the focal individuals. I then randomly placed  
174 an individual of the same sex into the small compartment; these were the partner individuals. I used  
175 individuals of the same sex to ensure I was measuring sociability rather than willingness to mate. I  
176 then placed these 24 arenas into four large plastic boxes (six in each) which I placed underneath a  
177 video camera (ABUS IP video surveillance 8MPx mini tube camera), so that each video camera  
178 recorded six arenas simultaneously. I maintained the room the video recordings occurred in at 20-  
179 22°C using portable heaters, while I used a thermometer to record the temperature at the start and

180 end of each trial. I was not able to control or monitor humidity during the trials. Once all arenas  
181 were in position and cameras focused, I started the recording and left the room. The lights  
182 automatically switched off after 40 minutes, and so the trial began 40 minutes after I left the room,  
183 in darkness, which is when *B. dubia* is active (Bouchebti *et al.*, 2022). I returned two hours after  
184 leaving to end the trial, meaning the trials lasted 80 minutes. In darkness the cameras automatically  
185 switch to infra-red filming using infra-red LEDs.

186 For each trial, every ten minutes I recorded the proximity of the focal individual (in the larger  
187 compartment) to the mesh that separated it from the partner individual (Fig. 1A), giving a maximum  
188 of eight measures per trial. The distance of an individual to a conspecific in this manner is often used  
189 to measure sociability (reviewed in: Gartland *et al.*, 2022). If the focal was sat directly on the mesh  
190 (perpendicular to the floor) I recorded a distance of zero, otherwise I used the hexagons on the  
191 bottom of the box to record how far the focal individual's head was from the mesh (Fig. 1A). Smaller  
192 values mean a focal individual closer to the partner individual which indicates higher sociability.  
193 Individuals were in some cases able to bypass the mesh (this occurred 95 times before the lights  
194 went out and 33 times after they did out of 288 trials, the 33 breaches after lights out are still  
195 included in the analyses with only the measurements before the breach used, see Data analysis). To  
196 avoid mixing individuals up at the end of the trial I dotted either the partner or the focal with white  
197 paint (Edding Extra-fine paint markers). I used the video recordings to determine when this  
198 happened and stopped recording data from the video as soon as either individual bypassed the  
199 mesh. If either individual bypassed the mesh in the 40 minutes the lights were on before the trial  
200 started then I recorded no data from that trial. At the end of the trial, I returned all individuals to  
201 their unique boxes. I then weighed all partner individuals to the nearest 0.01 g (Fisherbrand  
202 Analytical Balances, readability 0.0001 g). As described above, each individual in the two blocks was  
203 assayed once as a focal and acted once as a partner for another individual of the same sex in that  
204 block per week, and this was repeated for three weeks.

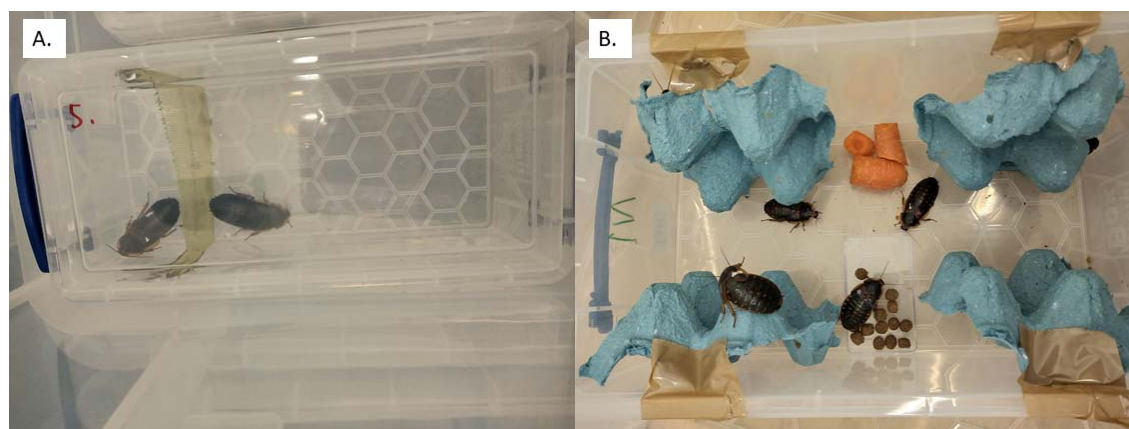

205

206 **Figure 1.** Pictures of experimental set-up (both DN Fisher). A. Assay for sociability. The position  
207 of the focal individual (on the right in the larger compartment, no white dot) in relation to the  
208 mesh is recorded every ten minutes to assess willingness to socialise. This individual would  
209 record a score of two. B. Social network trials. Marked individuals (here showing green-blue, red-  
210 white, white-blue, and green-white, starting at the top left and moving clockwise) can chose  
211 among four equal shelters (the cardboard egg trays taped to the sides of the box). Co-occurring  
212 at a shelter with the same individual regularly indicates a social association.

213

214 After the third trial I aggregated individuals into four groups of 21-24; all the individuals of the same  
215 sex from the same block were together, with groups having fewer than 24 individuals if any died (I  
216 did not replace individuals that died with stock individuals as I was only interested in the social  
217 network position of those with a known sociability from the dyadic trials). I gave each individual a  
218 unique combination of two colours (red, green, blue, white, gold) on their wing cases using paint  
219 pens (Edding Extra-fine paint markers; Fig. 1B) which allowed me to track them individually  
220 (combinations were repeated between groups i.e., red-blue featured in each of the four groups). I  
221 then placed each group into new plastic boxes (340 x 200 x 125 mm) along with four shelters made  
222 from cardboard egg tray (approx. 100 x 120 mm), each placed vertically at each corner on a long side  
223 (Fig. 1B). Shelters were taped to the walls of the box, creating clear space between both the shelter  
224 opposite it (on the opposite long side) and next to it (on the same long side). I placed 2 g dog food  
225 and 10 g carrot in the centre of each box. Each shelter was large enough to accommodate many but  
226 not all of the individuals, and the number of shelters was considerably less than the number of  
227 individuals. Therefore, the formation of aggregations in shelters was enforced, but individuals could  
228 move between shelters and therefore could exert some influence on who they co-habited with.  
229 Regularly after placing the individuals into these groups (after 3, 10, 14, 18, and 21 days) I recorded  
230 which individuals were using the same shelter. Individuals who could not be identified were  
231 recorded as such but they were not used to build the networks. Collecting data in this way gives a  
232 group-by-individual matrix analogous to those generated by observing flocks of birds or herds of  
233 ungulates in the wild, and further is similar to methods than have been used to generate social  
234 networks in forked fungus beetles (*Bolitotherus cornutus*; Formica *et al.*, 2012, 2016, 2020) and  
235 maritime earwigs (*Anisolabis maritima*; Vipperman, 2021). While a single incidence of sharing a  
236 shelter could be due to chance, by aggregating these observations I can infer consistent social  
237 associations. When recording these data, I also updated any paint markings that were starting to  
238 wear, maintaining individually-recognisable marks for the duration of the experiment, and replaced  
239 carrot and dog food as necessary.

240

#### 241 Data analysis

242 All analyses were conducted in R (version 4.1.0; R Development Core Team, 2016). To analyse  
243 sociability, I summed each individuals' distances from the mesh across the 1-8 records per trial and  
244 entered that as a response variable in a generalised linear mixed effects model using *glmmTMB*  
245 (Brooks *et al.*, 2017). To account for the different number of measures contributing to this sum (if  
246 individuals "breached" the barrier during the trial) I included an offset of the log of the number of  
247 records the individual recorded from the trial and used a Poisson error distribution and a log link  
248 function. This approach effectively models the mean distance the individual is from the mesh (sum /  
249 n. trials) but is preferable from directly using this variable as it can be used with a Poisson error  
250 distribution, which requires integers and so is incompatible with the mean value (the residuals are  
251 also greatly improved, see Fig. S1). I included fixed effects of the temperature in the room (scaled to  
252 a mean of zero and a standard deviation of one), the sex of the individual (and therefore also its  
253 partner), the body mass of the partner, scaled to a mean of zero and a standard deviation of one,  
254 and the interaction between (scaled) body mass and sex. The effect of the partner mass is key as its  
255 coefficient is our (unstandardised) estimate of  $\psi$ , while the interaction with sex tests whether this  
256 differs between the sexes. I included random effects of individual ID, partner ID, and date, to  
257 estimate the variance among focal individuals, partner individuals, and dates respectively. To  
258 estimate  $R$  for sociability I extracted the model intercept, the among-focal individual variance, and  
259 the sum of all variance components, and entered them into the 'QGicc' function in the package  
260 *QGglmm* (de Villemereuil *et al.*, 2016), using the 'model = "Poisson.log"' setting. This calculates  $R$  for

261 sociability on the original scale as opposed to the latent scale (Nakagawa & Schielzeth, 2010; de  
262 Villemereuil *et al.*, 2016); the former is necessary to compare to estimates of  $R$  from traits analysed  
263 assuming a Gaussian distribution. I repeated this with the among-partner individual variance instead  
264 of the among-focal individual variance to obtain the estimate of  $RI$ . Alongside the magnitudes of  $R$ , I  
265 demonstrated the importance of accounting for differences among individuals in sociability by  
266 comparing the AIC of the model described above to a model identical except that the random effect  
267 of focal individual was removed. I did the same for  $RI$  i.e., comparing models with and without the  
268 partner ID term (the models were otherwise identical to the one described above). To determine the  
269 clarity of fixed effects I used the ‘Anova’ function in the package *car* (Fox & Weisberg, 2019) with a  
270 type three sum of squares to generate p values (see: Dushoff *et al.*, 2019 for a discussion on the use  
271 of “clarity” over “significance”).

272 After finding a clear interaction between body mass and sex (see Results), I wished to obtain sex-  
273 specific estimates of  $\Psi$  that were standardised to facilitate comparisons across studies (note this was  
274 a decision made after viewing the initial results and so should be interpreted more cautiously). To do  
275 this I refitted the above model to the sexes separately (minus the fixed effect of sex and its  
276 interaction with body mass), this time with the mean distance the focal individual was from the  
277 mesh, scaled to a mean of zero and a standard deviation of one, as the response variable, with no  
278 offset and assuming a Gaussian error distribution with a normal link function. Using this transformed  
279 variable generates estimates of  $\Psi$  that are comparable across traits and studies (Bailey &  
280 Desjonquères, 2022).

281 To generate a social network per group I used each groups’ group-by-individual matrix, which  
282 contains records of which individual was in which shelter at each time point. From this I created four  
283 networks where individuals were linked with their relative association strengths, which is undirected  
284 i.e., individual A’s interaction with individual B is equal to individual B’s interaction with individual A.  
285 I calculated relative associations strengths as the simple ratio index (Cairns & Schwager, 1987), using  
286 the package *asnipe* (Farine, 2013). This index is the count of all times individuals shared a shelter,  
287 divided by the number of occasions both individuals were recorded (this could be less than five if an  
288 individual died during this phase of the study), and so indicates the relative strength of the  
289 association between any two individuals. A score of one indicates two individuals who were always  
290 seen sharing a shelter, and zero two individuals who never shared the same shelter. I summed each  
291 individual’s association scores to give its ‘strength’, a measure of network centrality that captures  
292 an individual’s overall engagement in social interactions and in this case is analogous to the average  
293 group size an individual was found in.

294 To test whether sociability as determined by the dyadic assays predicted sociability in the social  
295 network, I followed the suggestions of Hadfield *et al.* (2010) in the guide from Houslay and Wilson  
296 (2017) to estimate the among individual correlation between the two traits. This approach excludes  
297 the residual variance from the correlation, specifically addressing our question of interest (do  
298 individuals with higher sociability scores in the dyadic assay have higher sociability scores in the  
299 social network). To do this I fitted a bivariate mixed-effects model in MCMCglmm (Hadfield, 2010).  
300 The response variables were each of an individual’s sum of locations from the dyadic trials, and its  
301 strength as quantified in the social network. As there is only one value of the latter it is repeated  
302 each time an individual records a sociability score i.e., 1-3 times. I included the fixed effect of the log  
303 of the number of observations and modified the prior to constrain the relationship between this  
304 fixed effect and the sum of locations or network strength to 1 or 0 respectively (by setting the  
305 coefficients to 1 and 0 respectively and setting both variances as  $1 \times 10^{-9}$ ). This approach is  
306 equivalent to fitting number of observations as an offset for the sum of locations, and as having no

307 relationship at all with network strength. The random effect was a 2 x 2 covariance matrix estimating  
 308 the among individual variance in each trait and the among-individual covariance between them (our  
 309 parameter of interest). I allowed the residual variance for sociability in the dyadic assay to be non-  
 310 zero (as there are multiple measures on individuals) while I fixed it at 0.0001 for network strength  
 311 (as there is only a single measure it does not vary within individuals), and I fixed the residual  
 312 covariance at zero. I set a Poisson error distribution for sociability in the dyadic assay and a Gaussian  
 313 error distribution for network strength. I used 550,000 iterations, with the first 50,000 discarded and  
 314 1 in 100 of each subsequent iteration retained. I confirmed the model had converged by running  
 315 three chains and calculating the Gelman and Rubin convergence diagnostic (Gelman & Rubin, 1992;  
 316 point estimates were all 1.01 or lower), as well as assessing the trace plots. I calculated the among  
 317 individual correlation between the two measures of sociability as the among-individual covariance  
 318 between the two traits divided by the square root of the product of their two among-individual  
 319 variances and extracted the mode and 95% credible intervals from the resulting posterior  
 320 distribution.

321

## 322 Results

323

324 I collected 193 observations of sociability across 92 individuals. Individuals are weakly repeatable in  
 325 how sociable they are, with an  $R$  of 0.095, while the  $\Delta$ AIC of model with vs without the random  
 326 effect of focal individual ID was 839. This is a clear phenotypic indicator that there are DGEs for  
 327 sociability. Individuals exerted a small amount of repeatable influence on the sociability of their  
 328 partners, with an  $R$  of 0.045 ( $\Delta$ AIC = 776). The body mass of the partner individual influenced how  
 329 sociable the focal individual was, with males being more sociable with larger individuals and females  
 330 being more sociable with smaller individuals (Fig. 2; main effect  $\beta = 1.049$ ,  $se = 0.399$ ,  $\chi^2 = 6.901$ ,  $p =$   
 331  $0.009$ , interaction  $\beta = -2.912$ ,  $se = 0.566$ ,  $\chi^2 = 26.471$ ,  $p < 0.001$ ). Full model results are presented in  
 332 Table 1. Given this clear interaction, I fitted separate models to each sex to generate sex-specific and  
 333 standardised estimates of  $\Psi$ , giving  $\Psi_{\text{female}} = 0.032$  ( $se = 0.107$ ) and  $\Psi_{\text{male}} = -0.130$  ( $se = 0.106$ ; recall  
 334 that lower scores in the pairwise trial indicate higher sociability as they represent shorter distances  
 335 from the partner individual). There are therefore phenotypic indicators that there are IGEs on  
 336 individual sociability, but the direction of the effect is opposite in sign for the sexes.

337 **Table 1.** Full model output for analysis of sociability in dyadic trials. Females were set as the default  
 338 sex and so the effect of sex is the contrast between males and females.

|                            | Estimate | Standard Error | Chi-squared | P value |
|----------------------------|----------|----------------|-------------|---------|
| Intercept                  | -1.057   | 0.537          | 3.866       | 0.049   |
| Sex (Male contrast)        | -0.414   | 0.882          | 0.220       | 0.639   |
| Body mass of partner       | 1.049    | 0.399          | 6.901       | 0.009   |
| Temperature                | 0.131    | 0.178          | 0.545       | 0.461   |
| Sex : Body mass of partner | -2.912   | 0.566          | 26.471      | 0.000   |
|                            |          | Random effect  | Variance    |         |
|                            |          | Individual     | 2.669       |         |
|                            |          | Partner        | 1.997       |         |
|                            |          | Date           | 0.288       |         |

339



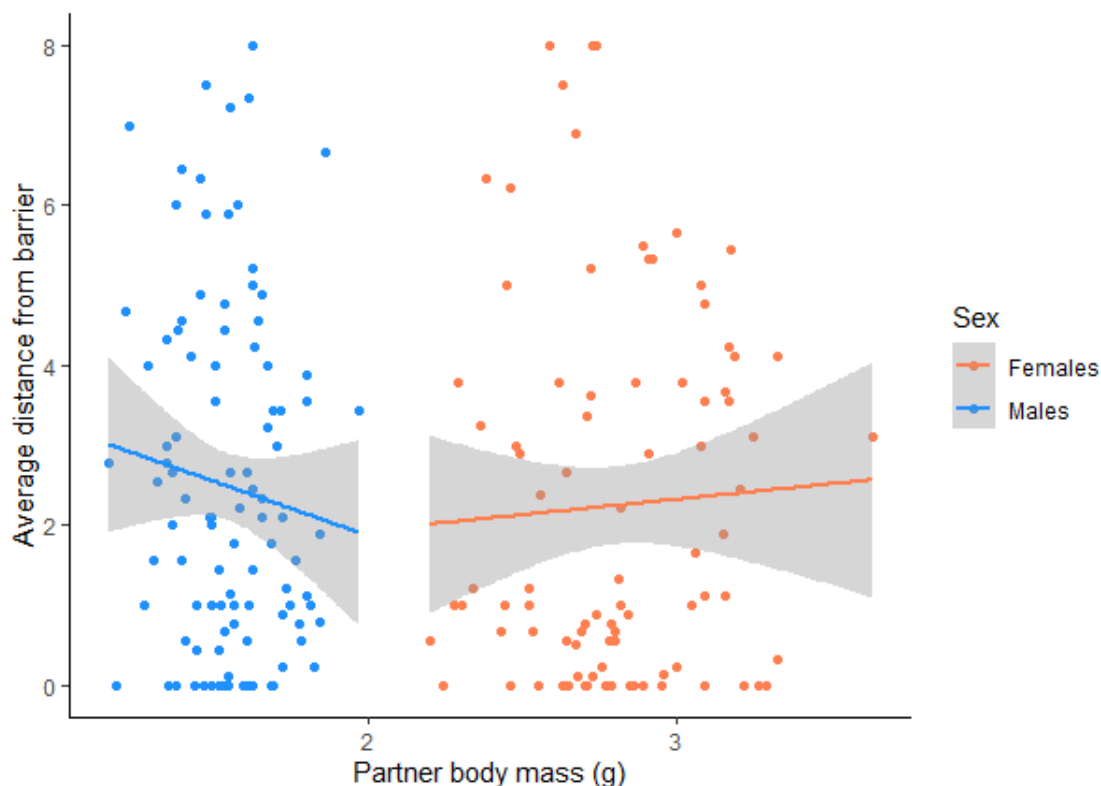

340

341 **Figure 2.** The body mass of the partner individual influences the sociability of the focal individual,  
342 with males (blue) preferring to be near heavier individuals, while females (orange) preferring to  
343 be nearer lighter individuals. Points are individual scores while lines indicate the mean effect  
344 estimated by the plotting function. Grey areas indicate the 95% confidence intervals around the  
345 mean.

346 The social networks produced by each of the four groups are shown in Fig. 3. Individuals that were  
347 more sociable in the pairwise trials had higher strength in the social network trials (Among-individual  
348 correlation between sociability and network strength, posterior distribution mode = -0.7585, 95%  
349 credible intervals = -0.948 to -0.265). Full model results are shown in Table S1.

350

## 351 Discussion

352 I found evidence that sociability was repeatable, and partners had a repeatable influence on the  
353 sociability of others, but both values were low. This implies that the direct and indirect genetic  
354 variance in the trait is likely to be low. I also found the body mass of partner influenced the  
355 sociability of the focal individual, but in sex-specific ways; males were more sociable with large  
356 individuals, while females were sociable with small individuals. As body mass is typically heritable  
357 this suggests that most of the evolutionary potential in sociability is in fact through the effect of  
358 body size; if body mass evolves, so will sociability, but in opposite directions for males and females.  
359 Finally, the measure of sociability in the dyadic trials was correlated among-individuals with a  
360 measure of centrality from a social network, indicating that this is a similar behavioural trait  
361 expressed in different contexts.

362 Finding sociability had non-zero repeatability is to be somewhat expected as behaviours typically are  
363 repeatable (Bell *et al.*, 2009; Holtmann *et al.*, 2017). However, social behaviours are much less

364 frequently assessed for repeatability than other behaviours such as activity, boldness, or courtship  
365 behaviours, e.g., only 35 out of 477 estimates of repeatability for behavioural traits in Holtmann *et*  
366 *al.* (2017) were for traits involved in social interactions. A low repeatability might be expected given  
367 social behaviours often depend on the phenotype of interaction partners which can be expected to  
368 vary substantially in sort periods of time (Holtmann *et al.*, 2017). Further, I found relatively little  
369 variance attributed to the identity of the partner individual. To explore this further, I re-ran the  
370 model with the mass of the partner (and its interaction with sex) removed. This reduced model gave  
371 a slightly higher estimate of  $V_S$  (2.14 vs. 2.00). Therefore, while body mass exerts some consistent  
372 effect on other individuals, other traits also contribute. In any case, most of the variation in  
373 sociability remains as residual variation (or within-individual variation if measurement error is low),  
374 indicating sociability is highly labile.

375

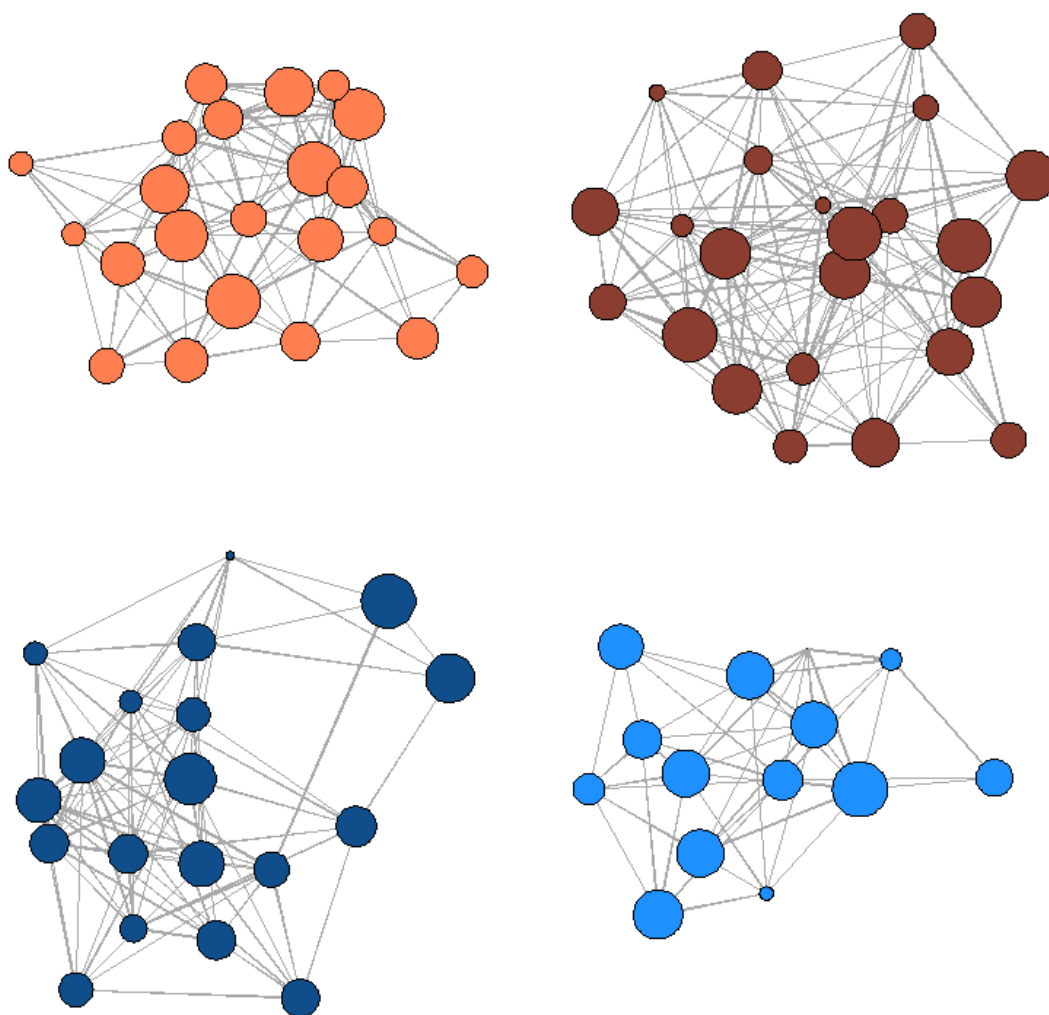

376

377 **Figure 3.** Social networks of *Blaptica dubia* individuals for each group (females on top row,  
378 males on bottom row, node size indicates sociability in pairwise trial [larger = more sociable],  
379 thickness of lines indicates strength of association). I have removed edge weights below 0.12 to  
380 reduce visual clutter.

381

382 Given that, on average, 52% of the among-individual variance of behaviours stems from direct  
383 additive genetic variance (Dochtermann *et al.*, 2015), we can expect sociability to have a low  
384 heritability even when the indirect genetic variance is included. This is in line with most published  
385 estimates for behavioural traits; using data on insects from Moore *et al.* (2019a) available at Dryad  
386 (Moore *et al.*, 2019b) the average narrow-sense heritability of behavioural traits it is 0.051, while for  
387 morphological traits it is 0.398 (Moore *et al.*, 2019b). A low heritability means selection would be  
388 translated into a small amount of evolutionary change, and so sociability and therefore mean group  
389 size may show limited response to direct selection. Estimating the direct and indirect heritability of  
390 sociability and obtaining ecologically relevant estimates of selection (or relationships between  
391 sociability and fitness components such as survival or longevity; Blumstein *et al.*, 2018; Brodin *et al.*,  
392 2019; Montero *et al.*, 2020) are logical next steps to better understand the microevolution of this  
393 trait (see also the artificial selection experiment of Scott *et al.*, 2022 who successfully increased  
394 sociability in *Drosophila melanogaster* over 25 generations).

395 Alongside the repeatability of sociability, I found that how sociable an individual was depended on  
396 the mass of the partner individual. Females preferred to be near smaller females, while males  
397 preferred to be near larger males i.e.,  $\psi$  was sex specific. While I predicted an effect of mass, I had  
398 not predicted a sex-specific effect. Females are larger than males and require protein for egg  
399 production which males do not (Maklakov *et al.*, 2008; Jensen *et al.*, 2015), and so females may be in  
400 more intense competition for resources with each other than males are. This competition could lead  
401 to them preferring to associate with smaller individuals who are presumably less competitive. In  
402 contrast, males may prefer larger individuals as they offer better protection from predators, more  
403 protection from desiccation, and possibly if larger males attract females, the so called “hotshot”  
404 effect (Beehler & Foster, 1988). Alternatively, both sexes may be seeking mating partners (I used  
405 unmated individuals), which are always smaller or larger than themselves for females and males  
406 respectively (see how the masses of the sexes do not overlap in Fig. 2). This would lead to females  
407 preferring to be near smaller females who are perhaps harder to distinguish from males, and vice  
408 versa for males (suggested by Han *et al.*, 2016, although they found no effect of partner body size on  
409 same-sex behaviour in water striders *Gerris lacustris*). While we would expect chemical  
410 communication to be important for mate choice cockroaches (Schal *et al.*, 1984; as well as for other  
411 social interactions: Moore, 1997; Moore *et al.*, 1997b), it is possible individuals use both chemical  
412 cues and morphological traits when searching for a partner. Testing these ideas, and the fitness  
413 consequences for both males and females for associating with large and small individuals (“social  
414 selection”; Wolf *et al.*, 1999; e.g.: Santostefano *et al.*, 2019; Fisher *et al.*, 2021), represent key next  
415 steps. Furthermore, it is worth highlighting that body mass represents only one trait that influences  
416 sociability; there may well be other morphological, behavioural, or chemical traits of partners that  
417 affect focal individual behaviour. While these are accounted for in the estimate of  $V_s$ , identifying the  
418 causal traits is a useful step for understanding the mechanisms underpinning social interactions.

419 Indirect genetic effects can fundamentally alter the direction and magnitude of evolutionary change,  
420 and so finding opposing estimates of  $\psi$  for the sexes implies that sociability in the sexes could follow  
421 quite different evolutionary trajectories. Whether they will do so or not depends on the genetic  
422 variance underpinning mass (which is likely to be non-zero, see Introduction and above) and  
423 sociability and the inter-sex genetic correlation for sociability (McGlothlin & Brodie, 2009). Any  
424 quantitative predictions at this stage would be premature given the number of assumptions I would  
425 be required to make, but it is interesting that same-sex social interactions potentially facilitate  
426 sexual conflict and therefore the evolution of sexual dimorphism in social behaviour thanks to  
427 estimates of  $\psi$  which are opposite for the sexes. Results here show that if population mean body  
428 mass increases, male sociability will increase, while female sociability will decrease. In general,

429 however, the estimates of  $\psi$  (which typically range from -1 to 1; Bailey & Desjonquères, 2022) in this  
430 study are quite near zero, indicating only modest deviations from a situation where individuals do  
431 not impact each other's traits through social interactions (this is quite common for estimates of  $\psi$   
432 between different traits; Bailey & Desjonquères, 2022).

433 My results add to increasing evidence that  $\psi$  varies among- (Kent *et al.*, 2008; Bleakley & Brodie III,  
434 2009; Bailey & Zuk, 2012; Edenbrow *et al.*, 2017; Marie-Orleach *et al.*, 2017; Culumber *et al.*, 2018;  
435 Kraft *et al.*, 2018) and within-populations (Edenbrow *et al.*, 2017; Signor *et al.*, 2017; Han *et al.*,  
436 2018).  $\psi$  itself can evolve (Chenoweth *et al.*, 2010; Bailey & Zuk, 2012; Rebar *et al.*, 2020), and the  
437 evolution of  $\psi$  can both increase or decrease the speed of evolutionary change (Kazancıoğlu *et al.*,  
438 2012). It is therefore clearly important to study this parameter in an evolutionary context to better  
439 understand the evolution of interacting phenotypes (Bailey & Desjonquères, 2022). This is especially  
440 true when the majority of the evolution potential of a trait may stem not from genetic variance in  
441 the trait (which is what is typically assumed), but from associations with other heritable traits (such  
442 as body mass in this study).

443 The sociability of an individual estimated through repeated pairwise trials over three weeks was  
444 related to the individual's centrality, in terms of its overall number and strength of associations, in a  
445 social network formed over 21 days. This result indicates that my assay for sociability accurately  
446 captures a facet of individual social behaviour, and this social behaviour is trait of an individual that  
447 is consistent across time and across contexts, and hence could be associated with lifetime  
448 reproductive success (Klueen & Brommer, 2013). What maintains consistent among-individual  
449 differences in sociability and social network position are open questions (Wilson *et al.*, 2012; Wilson  
450 & Krause, 2014; Gartland *et al.*, 2022). If the behaviour is indeed heritable, then different levels of  
451 sociability should give similar fitness on average, as otherwise selection would remove the variation  
452 in sociability from the population. Different levels of sociability may therefore represent different  
453 strategies that bring both benefits (e.g., a higher sociability decreases water loss) and costs (e.g., a  
454 higher sociability decreases access to resources). Furthermore, switching between strategies must  
455 impose costs in some way so that individuals cannot be completely plastic (Dall *et al.*, 2004; Snell-  
456 Rood, 2013). A second, not mutually exclusive, mechanism that could maintain variation in social  
457 strategies is if selection on the strategy is negative frequency dependent (Bergmüller & Taborsky,  
458 2010). Better understanding of patterns of selection for this and similar traits is therefore key for  
459 predicting evolutionary responses in natural populations, and, ultimately, population dynamics and  
460 viability.

461 In summary, sociability in *B. dubia* shows a small degree of repeatability, some consistent influence  
462 from the identity of a partner, and is correlated among-individuals between trials in pairs and trials  
463 in groups. Males preferred to associate with larger individuals while females preferred to associate  
464 with smaller individuals. The latter result suggests that the evolution of sociability, and therefore the  
465 evolution of group size, may fundamentally depend on evolutionary change in body mass, and could  
466 drive sexual dimorphism in social behaviour. These sex-specific estimates of  $\psi$  will be important for  
467 informing our models predicting microevolutionary change and for understanding sexual conflict.  
468 Future work will need to assess the fitness consequences of social behaviour and identifying the  
469 factors that predict patterns of social interactions in various more ecologically relevant settings.

470

471 **Acknowledgements**

472 I would like to thank Keith Lockhart for his invaluable work maintaining the stock population. Maria  
473 Moiron and Francesca Santostefano provided numerous useful comments and suggestions on an  
474 earlier draft. Funding was provided by the University of Aberdeen “Internal Funding to Pump-Prime  
475 Interdisciplinary Research and Impact Activities” fund. I have no competing interests.

476

477 **Data accessibility**

478 R code to conduct the analyses in this manuscript can be accessed at  
479 <https://github.com/DFofFreedom/Direct-and-indirect-phenotypic-effects-on-sociability>. The  
480 associated data will be added upon acceptance.

481

## 482 References

483

- 484 Alamer, A.H. & Hoffmann, K.H. 2014. Endocrine aspects of ovary growth and gestation in the  
485 Argentinian cockroach, *Blaptica dubia* (Dictyoptera, Blaberidae).  
486 <http://dx.doi.org/10.1080/07924259.2013.797935> **58**: 34–41. Taylor & Francis.
- 487 Bailey, N.W. & Desjonquères, C. 2022. The Indirect Genetic Effect Interaction Coefficient  $\psi$ :  
488 Theoretically Essential and Empirically Neglected. *J. Hered.* **113**: 79–90. Oxford Academic.
- 489 Bailey, N.W. & Zuk, M. 2012. Socially flexible female choice differs among populations of the Pacific  
490 field cricket: geographical variation in the interaction coefficient  $\psi$  ( $\Psi$ ). *Proc. Biol. Sci.* **279**:  
491 3589–96.
- 492 Baud, A., McPeck, S., Chen, N. & Hughes, K.A. 2022. Indirect Genetic Effects: A Cross-disciplinary  
493 Perspective on Empirical Studies. *J. Hered.* **113**: 1–15. Oxford Academic.
- 494 Beehler, B.M. & Foster, M.S. 1988. Hotshots, Hotspots, and Female Preference in the Organization of  
495 Lek Mating Systems. *Am. Nat.* **131**: 203–219.
- 496 Bell, A.M., Hankison, S.J. & Laskowski, K.L. 2009. The repeatability of behaviour: a meta-analysis.  
497 *Anim. Behav.* **77**: 771–783. Elsevier Ltd.
- 498 Bergmüller, R. & Taborsky, M. 2010. Animal personality due to social niche specialisation. *Trends*  
499 *Ecol. Evol.* **25**: 504–511.
- 500 Bewick, A.J., Vogel, K.J., Moore, A.J. & Schmitz, R.J. 2017. Evolution of DNA Methylation across  
501 Insects. *Mol. Biol. Evol.* **34**: 654. Oxford University Press.
- 502 Bijma, P. 2011. A general definition of the heritable variation that determines the potential of a  
503 population to evolve. *Genetics* **189**: 1347–1359.
- 504 Bijma, P. 2014. The quantitative genetics of indirect genetic effects: a selective review of modelling  
505 issues. *Heredity (Edinb)*. **112**: 61–69. The Genetics Society.
- 506 Bijma, P., Muir, W.M. & Van Arendonk, J.A.M. 2007. Multilevel selection 1: Quantitative genetics of  
507 inheritance and response to selection. *Genetics* **175**: 277–88.
- 508 Bijma, P. & Wade, M.J. 2008. The joint effects of kin, multilevel selection and indirect genetic effects  
509 on response to genetic selection. *J. Evol. Biol.* **21**: 1175–88.
- 510 Bleakley, B.H. & Brodie III, E.D. 2009. Indirect genetic effects influence antipredator behavior in  
511 guppies: Estimates of the coefficient of interaction  $\psi$  and the inheritance of reciprocity.  
512 *Evolution (N. Y)*. **63**: 1796–1806. Blackwell Publishing Inc.
- 513 Blumstein, D.T., Williams, D.M., Lim, A.N., Kroeger, S. & Martin, J.G.A. 2018. Strong social  
514 relationships are associated with decreased longevity in a facultatively social mammal. *Proc. R.*  
515 *Soc. B Biol. Sci.* **285**. Royal Society Publishing.
- 516 Bouchebti, S., Cortés-Fossati, F., Estepa, Á.V., Lozano, M.P., Calovi, D.S. & Arganda, S. 2022. Sex-  
517 Specific Effect of the Dietary Protein to Carbohydrate Ratio on Personality in the Dubia  
518 Cockroach. *Insects 2022, Vol. 13, Page 133* **13**: 133. Multidisciplinary Digital Publishing  
519 Institute.
- 520 Brent, L.J.N., Heilbronner, S.R., Horvath, J.E., Gonzalez-Martinez, J., Ruiz-Lambides, A., Robinson,  
521 A.G., *et al.* 2013. Genetic origins of social networks in rhesus macaques. *Sci. Rep.* **3**: 1042.
- 522 Brodin, T., Fogarty, S., Sih, A. & Cote, J. 2019. Personality-dependent survival of the invasive

- 523           mosquitofish: being social can be deadly. *Aquat. Invasions* **14**: 465–477.
- 524 Brooks, M.E., Kristensen, K., van Benthem, K.J., Magnusson, A., Berg, C.W., Nielsen, A., *et al.* 2017.  
525           glmmTMB Balances speed and flexibility among packages for modeling. *R J.* **9**: 378–400.
- 526 Cairns, S.J. & Schwager, S.J. 1987. A comparison of association indices. *Anim. Behav.* **35**: 1454–1469.
- 527 Chenoweth, S.F., Rundle, H.D. & Blows, M.W. 2010. Experimental evidence for the evolution of  
528           indirect genetic effects: changes in the interaction effect coefficient, psi (Psi), due to sexual  
529           selection. *Evolution (N. Y.)*. **64**: 1849–1856.
- 530 Clark, D.C., Beshear, D.D. & Moore, A.J. 1995. Role of Familiarity in Structuring Male–Male Social  
531           Interactions in the Cockroach *Gromphadorhina portentosa* (Dictyoptera: Blaberidae). *Ann.*  
532           *Entomol. Soc. Am.* **88**: 554–561. Oxford Academic.
- 533 Clark, D.C. & Moore, A.J. 1995. Genetic aspects of communication during male-male competition in  
534           the Madagascar hissing cockroach: honest signalling of size. *Heredity (Edinb.)*. **75**: 198–205.
- 535 Costa e Silva, J., Potts, B.M., Gilmour, A.R. & Kerr, R.J. 2017. Genetic-based interactions among tree  
536           neighbors: identification of the most influential neighbors, and estimation of correlations  
537           among direct and indirect genetic effects for leaf disease and growth in *Eucalyptus globulus*.  
538           *Heredity (Edinb.)*, doi: 10.1038/hdy.2017.25.
- 539 Culumber, Z.W., Kraft, B., Lemakos, V., Hoffner, E., Travis, J. & Hughes, K.A. 2018. GxG epistasis in  
540           growth and condition and the maintenance of genetic polymorphism in *Gambusia holbrooki*.  
541           *Evolution (N. Y.)*. **72**: 1146–1154. John Wiley & Sons, Ltd.
- 542 Dall, S.R.X., Houston, A.I. & McNamara, J.M. 2004. The behavioural ecology of personality: consistent  
543           individual differences from an adaptive perspective. *Ecol. Lett.* **7**: 734–739.
- 544 de Villemereuil, P., Schielzeth, H., Nakagawa, S. & Morrissey, M. 2016. General methods for  
545           evolutionary quantitative genetic inference from generalized mixed models. *Genetics* **204**:  
546           1281–1294.
- 547 Dochtermann, N.A. 2011. Testing Cheverud’s conjecture for behavioral correlations and behavioral  
548           syndromes. *Evolution* **65**: 1814–20.
- 549 Dochtermann, N.A., Schwab, T. & Sih, A. 2015. The contribution of additive genetic variation to  
550           personality variation: heritability of personality. *Proc. Biol. Sci.* **282**: 20142201. Royal Society of  
551           London.
- 552 Dohm, M.R. 2002. Repeatability estimates do not always set an upper limit to heritability. *Funct.*  
553           *Ecol.* **16**: 273–280.
- 554 Dushoff, J., Kain, M.P. & Bolker, B.M. 2019. I can see clearly now: Reinterpreting statistical  
555           significance. *Methods Ecol. Evol.* **10**: 756–759. British Ecological Society.
- 556 Edenbrow, M., Bleakley, B.H., Darden, S.K., Tyler, C.R., Ramnarine, I.W. & Croft, D.P. 2017. The  
557           evolution of cooperation: Interacting phenotypes among social partners. *Am. Nat.* **189**: 630–  
558           643. University of Chicago Press.
- 559 Ellen, E.D., Rodenburg, T.B., Albers, G.A.A., Bolhuis, J.E., Camerlink, I., Duijvesteijn, N., *et al.* 2014.  
560           The prospects of selection for social genetic effects to improve welfare and productivity in  
561           livestock. *Front. Genet.* **5**: 377. Frontiers Research Foundation.
- 562 Farine, D.R. 2013. Animal social network inference and permutations for ecologists in R using asnipe.  
563           *Methods Ecol. Evol.* **4**: 1187–1194.

- 564 Fisher, D.N., Legrice, R.J. & Painting, C.J. 2021. Social selection is density dependent but makes little  
565 contribution to total selection in New Zealand giraffe weevils. *Proc. R. Soc. B* **288**. The Royal  
566 Society.
- 567 Fisher, D.N. & McAdam, A.G. 2019. Indirect genetic effects clarify how traits can evolve even when  
568 fitness does not. *Evol. Lett.*, doi: 10.1002/evl3.98. John Wiley & Sons, Ltd.
- 569 Fisher, D.N. & Pruitt, J.N. 2019. Opposite responses to selection and where to find them. *J. Evol. Biol.*  
570 **32**: 505–518. John Wiley & Sons, Ltd (10.1111).
- 571 Formica, V. a, Wood, C.W., Larsen, W.B., Butterfield, R.E., Augat, M.E., Hougen, H.Y., *et al.* 2012.  
572 Fitness consequences of social network position in a wild population of forked fungus beetles  
573 (*Bolitotherus cornutus*). *J. Evol. Biol.* **25**: 130–137.
- 574 Formica, V., Donald, H., Marti, H., Irgebay, Z. & Brodie, E. 2020. Social network position experiences  
575 more variable selection than weaponry in wild subpopulations of forked fungus beetles. *J.*  
576 *Anim. Ecol.* **90**: 168–182. Blackwell Publishing Ltd.
- 577 Formica, V., Wood, C., Cook, P. & Brodie, E. 2016. Consistency of animal social networks after  
578 disturbance. *Behav. Ecol.* **28**: 85–93. Oxford University Press.
- 579 Fox, J. & Weisberg, S. 2019. *An R Companion to Applied Regression*, Third. Sage, Thousand Oaks (CA).
- 580 Gartland, L.A., Firth, J.A., Laskowski, K.L., Jeanson, R. & Ioannou, C.C. 2022. Sociability as a  
581 personality trait in animals: methods, causes and consequences. *Biol. Rev.* **97**: 802–816. John  
582 Wiley & Sons, Ltd.
- 583 Gelman, A. & Rubin, D.B. 1992. Inference from Iterative Simulation Using Multiple Sequences. *Stat.*  
584 *Sci.* **7**: 457–472. Institute of Mathematical Statistics.
- 585 Grandcolas, P. 1998. The Evolutionary Interplay of Social Behavior, Resource Use and Anti-Predator  
586 Behavior in Zetoborinae+ Blaberinae+Gyninae+Diplopterinae Cockroaches: A Phylogenetic  
587 Analysis. *Cladistics* **14**: 117–127. John Wiley & Sons, Ltd.
- 588 Griffing, B. 1967. Selection in reference to biological groups. I. Individual and group selection applied  
589 to populations of unordered groups. *Aust. J. Biol. Sci.* **20**: 127–39.
- 590 Hadfield, J.D. 2010. MCMC methods for multi-response generalized linear mixed models: The  
591 MCMCglmm R package. *J. Stat. Softw.* **33**: 1–22.
- 592 Hadfield, J.D., Nutall, A., Osorio, D. & Owens, I.P.F. 2007. Testing the phenotypic gambit: Phenotypic,  
593 genetic and environmental correlations of colour. *J. Evol. Biol.* **20**: 549–557. John Wiley & Sons,  
594 Ltd (10.1111).
- 595 Hadfield, J.D., Wilson, A.J., Garant, D., Sheldon, B.C. & Kruuk, L.E.B. 2010. The misuse of BLUP in  
596 ecology and evolution. *Am. Nat.* **175**: 116–25. The University of Chicago Press.
- 597 Han, C.S., Santostefano, F. & Dingemanse, N.J. 2016. Do social partners affect same-sex sexual  
598 behaviour in male water striders? *Anim. Behav.* **116**: 53–59. Academic Press.
- 599 Han, C.S., Tunj, C., Ulcik, J. & Dingemanse, N.J. 2018. Increased developmental density decreases the  
600 magnitude of indirect genetic effects expressed during agonistic interactions in an insect.  
601 *Evolution (N. Y.)* **72**: 2435–2448.
- 602 Holtmann, B., Lagisz, M. & Nakagawa, S. 2017. Metabolic rates, and not hormone levels, are a likely  
603 mediator of between-individual differences in behaviour: a meta-analysis. *Funct. Ecol.* **31**: 685–  
604 696.



- 605 Houslay, T.M. & Wilson, A.J. 2017. Avoiding the misuse of BLUP in behavioural ecology. *Behav. Ecol.*  
606 **12**: S9.
- 607 Jensen, K., McClure, C., Priest, N.K. & Hunt, J. 2015. Sex-specific effects of protein and carbohydrate  
608 intake on reproduction but not lifespan in *Drosophila melanogaster*. *Aging Cell* **14**: 605. Wiley-  
609 Blackwell.
- 610 Kazancioğlu, E., Klug, H. & Alonzo, S.H. 2012. The evolution of social interactions changes predictions  
611 about interacting phenotypes. *Evolution (N. Y.)*. **66**: 2056–2064.
- 612 Kent, C., Azanchi, R., Smith, B., Formosa, A. & Levine, J.D. 2008. Social Context Influences Chemical  
613 Communication in *D. melanogaster* Males. *Curr. Biol.* **18**: 1384–1389. Cell Press.
- 614 Kluen, E. & Brommer, J.E. 2013. Context-specific repeatability of personality traits in a wild bird: a  
615 reaction-norm perspective. *Behav. Ecol.* **24**: 650–658.
- 616 Knoll, A.T., Jiang, K. & Levitt, P. 2018. Quantitative trait locus mapping and analysis of heritable  
617 variation in affiliative social behavior and co-occurring traits. *Genes, Brain Behav.* **17**: e12431.  
618 John Wiley & Sons, Ltd.
- 619 Kraft, B., Lemakos, V.A., Travis, J. & Hughes, K.A. 2018. Pervasive indirect genetic effects on  
620 behavioral development in polymorphic eastern mosquitofish. *Behav. Ecol.* **29**: 289–300.  
621 Oxford Academic.
- 622 Krause, J. & Ruxton, G.D. 2002. *Living in groups*. Oxford University Press.
- 623 Kruuk, L.E.B. & Wilson, A.J. 2018. The challenge of estimating indirect genetic effects on behavior: A  
624 comment on Bailey et al. *Behav. Ecol.* **29**: 13–14. Oxford University Press.
- 625 Lea, A.J., Blumstein, D.T., Wey, T.W. & Martin, J.G.A. 2010. Heritable victimization and the benefits  
626 of agonistic relationships. *Proc. Natl. Acad. Sci. U. S. A.* **107**: 21587–92. National Academy of  
627 Sciences.
- 628 Maklakov, A.A., Simpson, S.J., Zajitschek, F., Hall, M.D., Dessmann, J., Clissold, F., et al. 2008. Sex-  
629 Specific Fitness Effects of Nutrient Intake on Reproduction and Lifespan. *Curr. Biol.* **18**: 1062–  
630 1066. Cell Press.
- 631 Marie-Orleach, L., Vogt-Burri, N., Mouginot, P., Schlatter, A., Vizoso, D.B., Bailey, N.W., et al. 2017.  
632 Indirect genetic effects and sexual conflicts: Partner genotype influences multiple  
633 morphological and behavioral reproductive traits in a flatworm. *Evolution (N. Y.)*. **71**: 1232–  
634 1245. Wiley/Blackwell (10.1111).
- 635 McGlothlin, J.W. & Brodie, E.D. 2009. How to measure indirect genetic effects: The congruence of  
636 trait-based and variance-partitioning approaches. *Evolution (N. Y.)*. **63**: 1785–1795.
- 637 McGlothlin, J.W. & Fisher, D.N. 2021. Social Selection and the Evolution of Maladaptation. *J. Hered.*,  
638 doi: 10.1093/JHERED/ESAB061. Oxford University Press (OUP).
- 639 Montero, A.P., Williams, D.M., Martin, J.G.A. & Blumstein, D.T. 2020. More social female yellow-  
640 bellied marmots, *Marmota flaviventer*, have enhanced summer survival. *Anim. Behav.*
- 641 Moore, A.J. 1997. The evolution of social signals: Morphological, functional, and genetic integration  
642 of the sex pheromone in *Nauphoeta cinerea*. *Evolution (N. Y.)*. **51**: 1920–1928. John Wiley &  
643 Sons, Ltd.
- 644 Moore, A.J., Brodie, E.D.I. & Wolf, J.B. 1997a. Interacting phenotypes and the evolutionary process: I.  
645 Direct and indirect genetic effects of social interactions. *Evolution (N. Y.)*. **51**: 1352–1362.

- 646 Moore, M.P., Whiteman, H.H. & Martin, R.A. 2019a. A mother's legacy: the strength of maternal  
647 effects in animal populations. *Ecol. Lett.* **ele.13351**. John Wiley & Sons, Ltd (10.1111).
- 648 Moore, M.P., Whiteman, H.H. & Martin, R.A. 2019b. Data from: A mother's legacy: the strength of  
649 maternal effects in animal populations.
- 650 Moore, P.J., Harris, W.E., Montrose, V.T., Levin, D. & Moore, A.J. 2004. Constraints on Evolution and  
651 Postcopulatory Sexual Selection: Trade-offs among Ejaculate Characteristics. *Evolution (N. Y.)*.  
652 **58**: 1773–1780.
- 653 Moore, P.J., Reagan-Wallin, N.L., Haynes, K.F. & Moore, A.J. 1997b. Odour conveys status on  
654 cockroaches. *Nat.* **1997 3896646 389**: 25–25. Nature Publishing Group.
- 655 Muir, W.M. 2005. Incorporation of competitive effects in forest tree or animal breeding programs.  
656 *Genetics* **170**: 1247–1259.
- 657 Nakagawa, S. & Schielzeth, H. 2010. Repeatability for Gaussian and non-Gaussian data: a practical  
658 guide for biologists. *Biol. Rev.* **85**: 935–956.
- 659 R Development Core Team. 2016. R: A language and environment for statistical computing. R  
660 Foundation for Statistical Computing, Vienna, Austria.
- 661 Rebar, D., Bailey, N.W., Jarrett, B.J.M. & Kilner, R.M. 2020. An evolutionary switch from sibling rivalry  
662 to sibling cooperation, caused by a sustained loss of parental care. *Proc. Natl. Acad. Sci. U. S. A.*  
663 **117**: 2544–2550. National Academy of Sciences.
- 664 Santostefano, F., Garant, D., Bergeron, P., Montiglio, P. & Réale, D. 2019. Social selection acts on  
665 behavior and body mass but does not contribute to the total selection differential in eastern  
666 chipmunks. *Evolution (N. Y.)*. **evo.13875**. John Wiley & Sons, Ltd (10.1111).
- 667 Schal, C., Gautier, J.Y. & Bell, W.J. 1984. Behavioral ecology of cockroaches. *Biol. Rev.* **59**: 209–254.  
668 John Wiley & Sons, Ltd.
- 669 Scott, A.M., Dworkin, I. & Dukas, R. 2022. Evolution of sociability by artificial selection. *Evolution (N.*  
670 *Y.)*. **76**: 541–553. John Wiley & Sons, Ltd.
- 671 Scott, A.M., Dworkin, I. & Dukas, R. 2018. Sociability in Fruit Flies: Genetic Variation, Heritability and  
672 Plasticity. *Behav. Genet.* **48**: 247–258.
- 673 Signor, S.A., Abbasi, M., Marjoram, P. & Nuzhdin, S. V. 2017. Social effects for locomotion vary  
674 between environments in *Drosophila melanogaster* females. *Evolution (N. Y.)*. **71**: 1765–1775.
- 675 Silk, J.B. 2007. The adaptive value of sociality in mammalian groups. *Philos. Trans. R. Soc. Lond. B.*  
676 *Biol. Sci.* **362**: 539–59. The Royal Society.
- 677 Snell-Rood, E.C. 2013. An overview of the evolutionary causes and consequences of behavioural  
678 plasticity. *Anim. Behav.* **85**: 1004–1011.
- 679 Staes, N., Weiss, A., Helsen, P., Korody, M., Eens, M. & Stevens, J.M.G. 2016. Bonobo personality  
680 traits are heritable and associated with vasopressin receptor gene 1a variation. *Sci. Reports*  
681 **2016 61 6**: 1–8. Nature Publishing Group.
- 682 Trubenová, B., Novak, S. & Hager, R. 2015. Indirect genetic effects and the dynamics of social  
683 interactions. *PLoS One* **10**: e0126907.
- 684 Viperman, A.C. 2021. Uninvited guests: Response of social networks to changing group composition  
685 in the maritime earwig (*Anisolabis maritima*). Villanova University.
- 686 Wilson, A.D.M. & Krause, J. 2014. Personality and social network analysis in animals. In: *Animal*

- 687            *Social Networks* (J. Krause, R. James, D. W. Franks, & D. P. Croft, eds). Oxford University Press,  
688            Oxford.
- 689    Wilson, A.D.M., Krause, S., Dingemanse, N.J. & Krause, J. 2012. Network position: a key component  
690            in the characterization of social personality types. *Behav. Ecol. Sociobiol.* **67**: 163–173.
- 691    Wolf, J.B., Brodie III, E.D., Cheverud, J.M., Moore, A.J. & Wade, M.J. 1998. Evolutionary  
692            consequences of indirect genetic effects. *Trends Ecol. Evol.* **13**: 64–69.
- 693    Wolf, J.B., Brodie III, E.D. & Moore, A.J. 1999. Interacting Phenotypes and the Evolutionary Process.  
694            II. Selection Resulting from Social Interactions. *Am. Nat.* **153**: 254–266.
- 695    Wu, H. 2013. Biology of *Blaptica dubia* (Blattodea: Blaberidae). Auburn University.  
696
